# Supplementary material for: Functional ultrasound imaging of stroke in awake rats
Source: eLife. 2023 Nov 21;12:RP88919. doi: 10.7554/eLife.88919 (PMC10662948; doi:10.7554/eLife.88919)
Supplement: Supplementary file 1. [file elife-88919-supp1.xlsx]

## Sheet: Feuil1
Animal Tag	Imaging session					Issue
	Control	Baseline (1hr)	Stroke	Early Post-Stroke (3hrs)	Late Post-Stroke (1hr)
Rat #1	Session excluded	Not performed			Not performed	Miss functional responses from thalamic nuclei as the imaging plane was too anterior
Rat #2	Not performed	Session excluded			Not performed	Unconsistency of functional responses during baseline. Issue with cranial window
Rat #3	Not performed	Session Included			Not performed
Rat #4	Not performed	Session Included			Not performed
Rat #5	Session Included	Not performed			Not performed
Rat #6	Not performed	Session Included			+ 5d Session Included
Rat #7	Not performed	Session Included			Not performed
Rat #8	2d before stroke Session Included	Session Included			+ 5d Session Included
Rat #9	2d before stroke Session Included	Session excluded			Not performed	Reperfusion of the MCA after stroke onset
Sessions used in	- Supplementary Figures 2, 4, 5	- Figures 2 and 3 - Movies 1 and 2 - Supplementary Figures 1 to 5			- Figure 4 - Supplementary Figures 4 and 5
