# Supplementary material for: Functional ultrasound imaging of stroke in awake rats
Source: eLife. 2023 Nov 21;12:RP88919. doi: 10.7554/eLife.88919 (PMC10662948; doi:10.7554/eLife.88919)
Supplement: Supplementary file 2. — Adapted from the Paxinos rat brain atlas (Paxinos, 2014). [file elife-88919-supp2.xlsx]

## Sheet: Feuil1
Supplementary Table 2. List of the 69 brain regions/hemisphere from the coronal cross-section µDoppler imaged in each rat organized by main anatomical structures. Adapted from the Paxinos rat brain atlas
Region Number	Region Abbreviation	Name of the region		Region Number	Region Abbreviation	Name of the region
Cortex (Ctx)				Thalamus (TH) 2/2
1	RSGc	Retrosplenial granular cortex, c region		36	MHb	Medial habenular nucleus
2	RSD	Retrosplenial dysgranular cortex		37	LHb	Lateral habenular nucleus
3	M2	Secondary motor cortex		38	PC	Paracentral thalamic nucleus
4	MPtA	Medial parietal association cortex		39	PVP	Paraventricular thalamic nucleus, posterior part
5	LPtA	Lateral parietal association cortex		40	IMD	Intermediodorsal thalamic nucleus
6	S1Tr	Primary somatosensory cortex, trunk region		41	CL	Centrolateral thalamic nucleus
7	S1DZ	Primary somatosensory cortex, dysgranular zone		42	Po	Posterior thalamic nuclear group
8	S1BF	Primary somatosensory cortex, barrel field		43	VPM	Ventral posteromedial thalamic nucleus
9	S2	Secondary somatosensory cortex		44	VPL	Ventral posterolateral thalamic nucleus
10	AuD	Secondary auditory cortex, dorsal area		45	Rt	Reticular thalamic nucleus
11	Au1	Primary auditory cortex		46	VM	Ventromedial thalamic nucleus
12	AuV	Secondary auditory cortex, ventral area		47	Rh	Rhomboid thalamic nucleus
13	Ect	Ectorhinal cortex		48	Re	Reuniens thalamic nucleus
14	PRh	Perirhinal cortex		49	Sub	Submedius thalamic nucleus
15	DLEnt	Dorsolateral entorhinal cortex		50	VRe	Ventral reuniens thalamic nucleus
16	DEn	Dorsal endopiriform nucleus		51	ZID	Zona incerta, dorsal part
17	Pir	Piriform cortex		52	ZIV	Zona incerta, ventral part
18	RAPir	Rostral amygdalopiriform area		53	STh	Subthalamic nucleus
19	PLCo	Posterolateral cortical amygdaloid nucleus		Striatum (STR)
20	PMCo	Posteromedial cortical amygdaloid nucleus		54	CPu	Caudate putamen
Hippocampus (HPC)				Hypothalamus (HTH)
21	DLG	Dorsal lateral geniculate nucleus		55	SubI	Subincertal nucleus
22	CA2	Field CA2 of the hippocampus		56	A11	A11dopamine cells
23	GrDG	Granular layer of the dentate gyrus		57	A13	A13 dopamine cells
24	LMol	Lacunosum moleculare layer of the hippocampus		58	PHD	Posterior hypothalamic area, dorsal part
25	MoDG	Molecular layer of the dentate gyrus		59	DA	Dorsal hypothalamic area
26	PoDG	Polymorph layer of the dentate gyrus		60	DMC	Dorsomedial hypothalamic nucleus, compact part
27	FC	Fasciola cinereum		61	DMD	Dorsomedial hypothalamic nucleus, dorsal part
28	Py	Pyramidal cell layer of the hippocampus		62	DMV	Dorsomedial hypothalamic nucleus, ventral part
29	SLu	Stratum lucidum of the hippocampus		63	PeFLH	Perifornical part of lateral hypothalamus
Thalamus (TH) 1/2				64	PeF	Perifornical nucleus
30	LDVL	Laterodorsal thalamic nucleus, ventrolateral part		65	PLH	Peduncular part of lateral hypothalamus
31	LPMR	Lateral posterior thalamic nucleus, mediorostral part		66	VMHSh	Ventromedial nucleus of the hypothalamus shell
32	MDL	Mediodorsal thalamic nucleus, lateral part		67	ArcL	Arcuate hypothalamic nucleus, lateral part
33	MDC	Mediodorsal thalamic nucleus, central part		68	ArcD	Arcuate hypothalamic nucleus, dorsal part
34	MDM	Mediodorsal thalamic nucleus, medial part		69	ArcM	Arcuate hypothalamic nucleus, medial part
35	OPC	Oval paracentral thalamic nucleus
